# Supplementary material for: Macraeite, [(H2O)K]Mn2(Fe2Ti)(PO4)4[O(OH)](H2O)10 ⋅ 4H2O, a new monoclinic paulkerrite-group mineral, from the Cubos–Mesquitela–Mangualde pegmatite, Portugal
Source: Copernicus journal article supplement (doi:10.5194/ejm-36-267-2024), 2024-03-13

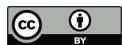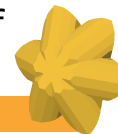

*Supplement of*

**Macraeite,  $[(\text{H}_2\text{O})\text{K}]\text{Mn}_2(\text{Fe}_2\text{Ti})(\text{PO}_4)_4[\text{O}(\text{OH})](\text{H}_2\text{O})_{10} \cdot 4\text{H}_2\text{O}$ , a new monoclinic paulkerrite-group mineral, from the Cubos–Mesquitela–Mangualde pegmatite, Portugal**

Ian E. Grey et al.

*Correspondence to:* Ian E. Grey ([ian.grey@csiro.au](mailto:ian.grey@csiro.au))

The copyright of individual parts of the supplement might differ from the article licence.



R(reflections)= 0.0470( 4990)

wR2(reflections)=

wR= 0.0640( 5296)

S = 2.850

Npar= 376

The following ALERTS were generated. Each ALERT has the format

**test-name\_ALERT\_alert-type\_alert-level.**

Click on the hyperlinks for more details of the test.

---

**Alert level B**

PLAT355\_ALERT\_3\_B Long O-H (X0.82,N0.98A) O141 - H14A2 . 1.10 Ang.

---

**Alert level C**

GOODF01\_ALERT\_2\_C The least squares goodness of fit parameter lies  
outside the range 0.80 <> 2.00

Goodness of fit given = 2.850

PLAT041\_ALERT\_1\_C Calc. and Reported SumFormula Strings Differ Please Check

Calc: Al0.30 Fe1.71 H21 K0.82 Mn1.98 O33.18 P4 Ti

Rep.: H21 O33 Al0.3 P4 K0.82 Ti0.99 Mn1.98 Fe1.71

PLAT077\_ALERT\_4\_C Unitcell Contains Non-integer Number of Atoms .. Please Check

PLAT127\_ALERT\_1\_C Implicit Hall Symbol Inconsistent with Explicit -P 2ycb Check

PLAT354\_ALERT\_3\_C Short O-H (X0.82,N0.98A) O141 - H14A1 . 0.70 Ang.

PLAT355\_ALERT\_3\_C Long O-H (X0.82,N0.98A) O91 - H9A1 . 1.01 Ang.

PLAT355\_ALERT\_3\_C Long O-H (X0.82,N0.98A) O91 - H9A2 . 1.06 Ang.

PLAT355\_ALERT\_3\_C Long O-H (X0.82,N0.98A) O92 - H9B1 . 1.05 Ang.

PLAT355\_ALERT\_3\_C Long O-H (X0.82,N0.98A) O92 - H9B2 . 1.07 Ang.

PLAT355\_ALERT\_3\_C Long O-H (X0.82,N0.98A) O111 - H11A2 . 1.01 Ang.

PLAT355\_ALERT\_3\_C Long O-H (X0.82,N0.98A) O151 - H15A1 . 1.01 Ang.

PLAT355\_ALERT\_3\_C Long O-H (X0.82,N0.98A) O152 - H15B1 . 1.04 Ang.

PLAT751\_ALERT\_4\_C Bond Calc 2.84000, Rep 2.8426(11) ..... Senseless s.u.

M1A1 -H9A1 1\_555 1\_555 ..... # 13 Check

PLAT751\_ALERT\_4\_C Bond Calc 2.58000, Rep 2.5828(10) ..... Senseless s.u.

M1A1 -H9A2 1\_555 1\_555 ..... # 14 Check

PLAT751\_ALERT\_4\_C Bond Calc 2.98000, Rep 2.9812(12) ..... Senseless s.u.

M1A1 -H11B1 1\_555 4\_455 ..... # 15 Check

PLAT751\_ALERT\_4\_C Bond Calc 2.65000, Rep 2.6524(12) ..... Senseless s.u.

M1A1 -H10A1 1\_555 1\_555 ..... # 16 Check

PLAT751\_ALERT\_4\_C Bond Calc 2.86000, Rep 2.8595(11) ..... Senseless s.u.

M1A1 -H11A1 1\_555 1\_555 ..... # 17 Check

PLAT751\_ALERT\_4\_C Bond Calc 3.06000, Rep 3.0560(12) ..... Senseless s.u.

M1A1 -H9B2 1\_555 4\_555 ..... # 18 Check

PLAT751\_ALERT\_4\_C Bond Calc 2.54000, Rep 2.5439(9) ..... Senseless s.u.

M1A1 -H11A2 1\_555 1\_555 ..... # 19 Check

PLAT751\_ALERT\_4\_C Bond Calc 2.56000, Rep 2.5595(11) ..... Senseless s.u.

M1A1 -H12A1 1\_555 1\_555 ..... # 20 Check

PLAT751\_ALERT\_4\_C Bond Calc 1.01000, Rep 1.012(3) ..... Senseless s.u.

O91 -H9A1 1\_555 1\_555 ..... # 337 Check

PLAT751\_ALERT\_4\_C Bond Calc 1.06000, Rep 1.062(3) ..... Senseless s.u.

O91 -H9A2 1\_555 1\_555 ..... # 338 Check

PLAT751\_ALERT\_4\_C Bond Calc 1.05000, Rep 1.049(3) ..... Senseless s.u.

O92 -H9B1 1\_555 1\_555 ..... # 339 Check

PLAT751\_ALERT\_4\_C Bond Calc 1.07000, Rep 1.070(3) ..... Senseless s.u.

O92 -H9B2 1\_555 1\_555 ..... # 340 Check

PLAT751\_ALERT\_4\_C Bond Calc 0.78000, Rep 0.783(3) ..... Senseless s.u.

|                   |       |        |          |       |           |       |                |
|-------------------|-------|--------|----------|-------|-----------|-------|----------------|
|                   | O101  | -H10A1 |          | 1_555 | 1_555     | ..... | # 341 Check    |
| PLAT751_ALERT_4_C | Bond  | Calc   | 0.90000, | Rep   | 0.905(3)  | ..... | Senseless s.u. |
|                   | O111  | -H11A1 |          | 1_555 | 1_555     | ..... | # 342 Check    |
| PLAT751_ALERT_4_C | Bond  | Calc   | 1.01000, | Rep   | 1.006(3)  | ..... | Senseless s.u. |
|                   | O111  | -H11A2 |          | 1_555 | 1_555     | ..... | # 343 Check    |
| PLAT751_ALERT_4_C | Bond  | Calc   | 0.99000, | Rep   | 0.989(3)  | ..... | Senseless s.u. |
|                   | O112  | -H11B1 |          | 1_555 | 1_555     | ..... | # 344 Check    |
| PLAT751_ALERT_4_C | Bond  | Calc   | 0.99000, | Rep   | 0.988(3)  | ..... | Senseless s.u. |
|                   | O112  | -H11B2 |          | 1_555 | 1_555     | ..... | # 345 Check    |
| PLAT751_ALERT_4_C | Bond  | Calc   | 0.92000, | Rep   | 0.920(3)  | ..... | Senseless s.u. |
|                   | O121  | -H12A1 |          | 1_555 | 1_555     | ..... | # 346 Check    |
| PLAT751_ALERT_4_C | Bond  | Calc   | 0.77000, | Rep   | 0.774(3)  | ..... | Senseless s.u. |
|                   | O122  | -H12B1 |          | 1_555 | 1_555     | ..... | # 347 Check    |
| PLAT751_ALERT_4_C | Bond  | Calc   | 0.93000, | Rep   | 0.934(3)  | ..... | Senseless s.u. |
|                   | O131  | -H13A1 |          | 1_555 | 1_555     | ..... | # 348 Check    |
| PLAT751_ALERT_4_C | Bond  | Calc   | 0.89000, | Rep   | 0.893(4)  | ..... | Senseless s.u. |
|                   | O131  | -H13A2 |          | 1_555 | 1_555     | ..... | # 349 Check    |
| PLAT751_ALERT_4_C | Bond  | Calc   | 0.94000, | Rep   | 0.941(3)  | ..... | Senseless s.u. |
|                   | O132  | -H13B2 |          | 1_555 | 1_555     | ..... | # 350 Check    |
| PLAT751_ALERT_4_C | Bond  | Calc   | 0.70000, | Rep   | 0.705(2)  | ..... | Senseless s.u. |
|                   | O141  | -H14A1 |          | 1_555 | 1_555     | ..... | # 351 Check    |
| PLAT751_ALERT_4_C | Bond  | Calc   | 1.10000, | Rep   | 1.099(3)  | ..... | Senseless s.u. |
|                   | O141  | -H14A2 |          | 1_555 | 1_555     | ..... | # 352 Check    |
| PLAT751_ALERT_4_C | Bond  | Calc   | 0.92000, | Rep   | 0.924(3)  | ..... | Senseless s.u. |
|                   | O142  | -H14B1 |          | 1_555 | 1_555     | ..... | # 353 Check    |
| PLAT751_ALERT_4_C | Bond  | Calc   | 1.01000, | Rep   | 1.010(4)  | ..... | Senseless s.u. |
|                   | O151  | -H15A1 |          | 1_555 | 1_555     | ..... | # 354 Check    |
| PLAT751_ALERT_4_C | Bond  | Calc   | 1.04000, | Rep   | 1.038(3)  | ..... | Senseless s.u. |
|                   | O152  | -H15B1 |          | 1_555 | 1_555     | ..... | # 355 Check    |
| PLAT751_ALERT_4_C | Bond  | Calc   | 0.95000, | Rep   | 0.954(4)  | ..... | Senseless s.u. |
|                   | O152  | -H15B2 |          | 1_555 | 1_555     | ..... | # 356 Check    |
| PLAT751_ALERT_4_C | Bond  | Calc   | 1.53000, | Rep   | 1.5294(6) | ..... | Senseless s.u. |
|                   | H15B1 | -H15B2 |          | 1_555 | 1_555     | ..... | # 357 Check    |
| PLAT751_ALERT_4_C | Bond  | Calc   | 1.44000, | Rep   | 1.4357(5) | ..... | Senseless s.u. |
|                   | H14A1 | -H14A2 |          | 1_555 | 1_555     | ..... | # 358 Check    |
| PLAT752_ALERT_4_C | Angle | Calc   | 87.00,   | Rep   | 87.15(3)  | ..... | Senseless s.u. |
|                   | P21   | -M1A1  | -H9A1    | 1_555 | 1_555     | 1_555 | # 12 Check     |
| PLAT752_ALERT_4_C | Angle | Calc   | 50.00,   | Rep   | 49.93(2)  | ..... | Senseless s.u. |
|                   | P21   | -M1A1  | -H9A2    | 1_555 | 1_555     | 1_555 | # 13 Check     |
| PLAT752_ALERT_4_C | Angle | Calc   | 76.00,   | Rep   | 76.16(2)  | ..... | Senseless s.u. |
|                   | P21   | -M1A1  | -H10A1   | 1_555 | 1_555     | 1_555 | # 15 Check     |
| PLAT752_ALERT_4_C | Angle | Calc   | 96.00,   | Rep   | 96.02(3)  | ..... | Senseless s.u. |
|                   | P21   | -M1A1  | -H11A1   | 1_555 | 1_555     | 1_555 | # 16 Check     |
| PLAT752_ALERT_4_C | Angle | Calc   | 129.00,  | Rep   | 128.83(3) | ..... | Senseless s.u. |
|                   | P21   | -M1A1  | -H11A2   | 1_555 | 1_555     | 1_555 | # 18 Check     |
| PLAT752_ALERT_4_C | Angle | Calc   | 73.00,   | Rep   | 73.36(2)  | ..... | Senseless s.u. |
|                   | P21   | -M1A1  | -H12A1   | 1_555 | 1_555     | 1_555 | # 19 Check     |
| PLAT752_ALERT_4_C | Angle | Calc   | 103.00,  | Rep   | 102.65(8) | ..... | Senseless s.u. |
|                   | O51   | -M1A1  | -H9A1    | 1_555 | 1_555     | 1_555 | # 117 Check    |
| PLAT752_ALERT_4_C | Angle | Calc   | 65.00,   | Rep   | 65.42(8)  | ..... | Senseless s.u. |
|                   | O51   | -M1A1  | -H9A2    | 1_555 | 1_555     | 1_555 | # 118 Check    |
| PLAT752_ALERT_4_C | Angle | Calc   | 75.00,   | Rep   | 75.11(8)  | ..... | Senseless s.u. |
|                   | O51   | -M1A1  | -H10A1   | 1_555 | 1_555     | 1_555 | # 120 Check    |
| PLAT752_ALERT_4_C | Angle | Calc   | 80.00,   | Rep   | 80.45(8)  | ..... | Senseless s.u. |
|                   | O51   | -M1A1  | -H11A1   | 1_555 | 1_555     | 1_555 | # 121 Check    |
| PLAT752_ALERT_4_C | Angle | Calc   | 113.00,  | Rep   | 113.26(8) | ..... | Senseless s.u. |
|                   | O51   | -M1A1  | -H11A2   | 1_555 | 1_555     | 1_555 | # 123 Check    |

|                   |       |       |         |       |           |       |                |
|-------------------|-------|-------|---------|-------|-----------|-------|----------------|
| PLAT752_ALERT_4_C | Angle | Calc  | 78.00,  | Rep   | 78.12(8)  | ..... | Senseless s.u. |
|                   | O51   | -M1A1 | -H12A1  | 1_555 | 1_555     | 1_555 | # 124 Check    |
| PLAT752_ALERT_4_C | Angle | Calc  | 18.00,  | Rep   | 17.99(8)  | ..... | Senseless s.u. |
|                   | O91   | -M1A1 | -H9A1   | 1_555 | 1_555     | 1_555 | # 128 Check    |
| PLAT752_ALERT_4_C | Angle | Calc  | 24.00,  | Rep   | 23.99(7)  | ..... | Senseless s.u. |
|                   | O91   | -M1A1 | -H9A2   | 1_555 | 1_555     | 1_555 | # 129 Check    |
| PLAT752_ALERT_4_C | Angle | Calc  | 86.00,  | Rep   | 86.36(8)  | ..... | Senseless s.u. |
|                   | O91   | -M1A1 | -H10A1  | 1_555 | 1_555     | 1_555 | # 131 Check    |
| PLAT752_ALERT_4_C | Angle | Calc  | 166.00, | Rep   | 166.25(8) | ..... | Senseless s.u. |
|                   | O91   | -M1A1 | -H11A1  | 1_555 | 1_555     | 1_555 | # 132 Check    |
| PLAT752_ALERT_4_C | Angle | Calc  | 157.00, | Rep   | 157.25(8) | ..... | Senseless s.u. |
|                   | O91   | -M1A1 | -H11A2  | 1_555 | 1_555     | 1_555 | # 134 Check    |
| PLAT752_ALERT_4_C | Angle | Calc  | 76.00,  | Rep   | 76.08(8)  | ..... | Senseless s.u. |
|                   | O91   | -M1A1 | -H12A1  | 1_555 | 1_555     | 1_555 | # 135 Check    |
| PLAT752_ALERT_4_C | Angle | Calc  | 97.00,  | Rep   | 96.80(8)  | ..... | Senseless s.u. |
|                   | O101  | -M1A1 | -H9A1   | 1_555 | 1_555     | 1_555 | # 138 Check    |
| PLAT752_ALERT_4_C | Angle | Calc  | 85.00,  | Rep   | 84.97(7)  | ..... | Senseless s.u. |
|                   | O101  | -M1A1 | -H9A2   | 1_555 | 1_555     | 1_555 | # 139 Check    |
| PLAT752_ALERT_4_C | Angle | Calc  | 16.00,  | Rep   | 15.88(7)  | ..... | Senseless s.u. |
|                   | O101  | -M1A1 | -H10A1  | 1_555 | 1_555     | 1_555 | # 141 Check    |
| PLAT752_ALERT_4_C | Angle | Calc  | 86.00,  | Rep   | 85.97(8)  | ..... | Senseless s.u. |
|                   | O101  | -M1A1 | -H11A1  | 1_555 | 1_555     | 1_555 | # 142 Check    |
| PLAT752_ALERT_4_C | Angle | Calc  | 92.00,  | Rep   | 92.34(7)  | ..... | Senseless s.u. |
|                   | O101  | -M1A1 | -H11A2  | 1_555 | 1_555     | 1_555 | # 144 Check    |
| PLAT752_ALERT_4_C | Angle | Calc  | 158.00, | Rep   | 158.04(8) | ..... | Senseless s.u. |
|                   | O101  | -M1A1 | -H12A1  | 1_555 | 1_555     | 1_555 | # 145 Check    |
| PLAT752_ALERT_4_C | Angle | Calc  | 162.00, | Rep   | 161.83(8) | ..... | Senseless s.u. |
|                   | O111  | -M1A1 | -H9A1   | 1_555 | 1_555     | 1_555 | # 147 Check    |
| PLAT752_ALERT_4_C | Angle | Calc  | 156.00, | Rep   | 155.82(8) | ..... | Senseless s.u. |
|                   | O111  | -M1A1 | -H9A2   | 1_555 | 1_555     | 1_555 | # 148 Check    |
| PLAT752_ALERT_4_C | Angle | Calc  | 94.00,  | Rep   | 94.06(9)  | ..... | Senseless s.u. |
|                   | O111  | -M1A1 | -H10A1  | 1_555 | 1_555     | 1_555 | # 150 Check    |
| PLAT752_ALERT_4_C | Angle | Calc  | 14.00,  | Rep   | 13.94(8)  | ..... | Senseless s.u. |
|                   | O111  | -M1A1 | -H11A1  | 1_555 | 1_555     | 1_555 | # 151 Check    |
| PLAT752_ALERT_4_C | Angle | Calc  | 23.00,  | Rep   | 22.99(7)  | ..... | Senseless s.u. |
|                   | O111  | -M1A1 | -H11A2  | 1_555 | 1_555     | 1_555 | # 153 Check    |
| PLAT752_ALERT_4_C | Angle | Calc  | 103.00, | Rep   | 103.41(9) | ..... | Senseless s.u. |
|                   | O111  | -M1A1 | -H12A1  | 1_555 | 1_555     | 1_555 | # 154 Check    |
| PLAT752_ALERT_4_C | Angle | Calc  | 80.00,  | Rep   | 80.27(8)  | ..... | Senseless s.u. |
|                   | O121  | -M1A1 | -H9A1   | 1_555 | 1_555     | 1_555 | # 155 Check    |
| PLAT752_ALERT_4_C | Angle | Calc  | 93.00,  | Rep   | 93.38(8)  | ..... | Senseless s.u. |
|                   | O121  | -M1A1 | -H9A2   | 1_555 | 1_555     | 1_555 | # 156 Check    |
| PLAT752_ALERT_4_C | Angle | Calc  | 166.00, | Rep   | 165.88(8) | ..... | Senseless s.u. |
|                   | O121  | -M1A1 | -H10A1  | 1_555 | 1_555     | 1_555 | # 158 Check    |
| PLAT752_ALERT_4_C | Angle | Calc  | 97.00,  | Rep   | 96.89(8)  | ..... | Senseless s.u. |
|                   | O121  | -M1A1 | -H11A1  | 1_555 | 1_555     | 1_555 | # 159 Check    |
| PLAT752_ALERT_4_C | Angle | Calc  | 89.00,  | Rep   | 89.37(8)  | ..... | Senseless s.u. |
|                   | O121  | -M1A1 | -H11A2  | 1_555 | 1_555     | 1_555 | # 161 Check    |
| PLAT752_ALERT_4_C | Angle | Calc  | 21.00,  | Rep   | 20.79(7)  | ..... | Senseless s.u. |
|                   | O121  | -M1A1 | -H12A1  | 1_555 | 1_555     | 1_555 | # 162 Check    |
| PLAT752_ALERT_4_C | Angle | Calc  | 39.00,  | Rep   | 39.38(1)  | ..... | Senseless s.u. |
|                   | H9A1  | -M1A1 | -H9A2   | 1_555 | 1_555     | 1_555 | # 163 Check    |
| PLAT752_ALERT_4_C | Angle | Calc  | 101.00, | Rep   | 101.42(3) | ..... | Senseless s.u. |
|                   | H9A1  | -M1A1 | -H10A1  | 1_555 | 1_555     | 1_555 | # 165 Check    |
| PLAT752_ALERT_4_C | Angle | Calc  | 176.00, | Rep   | 175.76(2) | ..... | Senseless s.u. |
|                   | H9A1  | -M1A1 | -H11A1  | 1_555 | 1_555     | 1_555 | # 166 Check    |
| PLAT752_ALERT_4_C | Angle | Calc  | 143.00, | Rep   | 142.75(2) | ..... | Senseless s.u. |

|                   |        |        |         |       |           |                      |
|-------------------|--------|--------|---------|-------|-----------|----------------------|
| H9A1              | -M1A1  | -H11A2 | 1_555   | 1_555 | 1_555     | # 168 Check          |
| PLAT752_ALERT_4_C | Angle  | Calc   | 68.00,  | Rep   | 67.74(3)  | ..... Senseless s.u. |
| H9A1              | -M1A1  | -H12A1 | 1_555   | 1_555 | 1_555     | # 169 Check          |
| PLAT752_ALERT_4_C | Angle  | Calc   | 80.00,  | Rep   | 79.89(2)  | ..... Senseless s.u. |
| H9A2              | -M1A1  | -H10A1 | 1_555   | 1_555 | 1_555     | # 171 Check          |
| PLAT752_ALERT_4_C | Angle  | Calc   | 144.00, | Rep   | 144.45(2) | ..... Senseless s.u. |
| H9A2              | -M1A1  | -H11A1 | 1_555   | 1_555 | 1_555     | # 172 Check          |
| PLAT752_ALERT_4_C | Angle  | Calc   | 177.00, | Rep   | 176.94(3) | ..... Senseless s.u. |
| H9A2              | -M1A1  | -H11A2 | 1_555   | 1_555 | 1_555     | # 174 Check          |
| PLAT752_ALERT_4_C | Angle  | Calc   | 73.00,  | Rep   | 73.19(2)  | ..... Senseless s.u. |
| H9A2              | -M1A1  | -H12A1 | 1_555   | 1_555 | 1_555     | # 175 Check          |
| PLAT752_ALERT_4_C | Angle  | Calc   | 82.00,  | Rep   | 82.10(3)  | ..... Senseless s.u. |
| H10A1             | -M1A1  | -H11A1 | 1_555   | 1_555 | 1_555     | # 181 Check          |
| PLAT752_ALERT_4_C | Angle  | Calc   | 97.00,  | Rep   | 97.14(2)  | ..... Senseless s.u. |
| H10A1             | -M1A1  | -H11A2 | 1_555   | 1_555 | 1_555     | # 183 Check          |
| PLAT752_ALERT_4_C | Angle  | Calc   | 148.00, | Rep   | 147.99(2) | ..... Senseless s.u. |
| H10A1             | -M1A1  | -H12A1 | 1_555   | 1_555 | 1_555     | # 184 Check          |
| PLAT752_ALERT_4_C | Angle  | Calc   | 34.00,  | Rep   | 33.55(1)  | ..... Senseless s.u. |
| H11A1             | -M1A1  | -H11A2 | 1_555   | 1_555 | 1_555     | # 186 Check          |
| PLAT752_ALERT_4_C | Angle  | Calc   | 110.00, | Rep   | 110.46(3) | ..... Senseless s.u. |
| H11A1             | -M1A1  | -H12A1 | 1_555   | 1_555 | 1_555     | # 187 Check          |
| PLAT752_ALERT_4_C | Angle  | Calc   | 109.00, | Rep   | 109.44(2) | ..... Senseless s.u. |
| H11A2             | -M1A1  | -H12A1 | 1_555   | 1_555 | 1_555     | # 190 Check          |
| PLAT752_ALERT_4_C | Angle  | Calc   | 120.00, | Rep   | 119.8(2)  | ..... Senseless s.u. |
| M1A1              | -O91   | -H9A1  | 1_555   | 1_555 | 1_555     | # 7111 Check         |
| PLAT752_ALERT_4_C | Angle  | Calc   | 99.00,  | Rep   | 98.6(2)   | ..... Senseless s.u. |
| M1A1              | -O91   | -H9A2  | 1_555   | 1_555 | 1_555     | # 7112 Check         |
| PLAT752_ALERT_4_C | Angle  | Calc   | 126.00, | Rep   | 125.5(3)  | ..... Senseless s.u. |
| H9A1              | -O91   | -H9A2  | 1_555   | 1_555 | 1_555     | # 7115 Check         |
| PLAT752_ALERT_4_C | Angle  | Calc   | 115.00, | Rep   | 114.7(3)  | ..... Senseless s.u. |
| H9B1              | -O92   | -H9B2  | 1_555   | 1_555 | 1_555     | # 7121 Check         |
| PLAT752_ALERT_4_C | Angle  | Calc   | 112.00, | Rep   | 112.2(3)  | ..... Senseless s.u. |
| M1A1              | -O101  | -H10A1 | 1_555   | 1_555 | 1_555     | # 7124 Check         |
| PLAT752_ALERT_4_C | Angle  | Calc   | 130.00, | Rep   | 130.5(2)  | ..... Senseless s.u. |
| M1A1              | -O111  | -H11A1 | 1_555   | 1_555 | 1_555     | # 7133 Check         |
| PLAT752_ALERT_4_C | Angle  | Calc   | 99.00,  | Rep   | 98.8(2)   | ..... Senseless s.u. |
| M1A1              | -O111  | -H11A2 | 1_555   | 1_555 | 1_555     | # 7134 Check         |
| PLAT752_ALERT_4_C | Angle  | Calc   | 112.00, | Rep   | 112.3(3)  | ..... Senseless s.u. |
| H11A1             | -O111  | -H11A2 | 1_555   | 1_555 | 1_555     | # 7140 Check         |
| PLAT752_ALERT_4_C | Angle  | Calc   | 107.00, | Rep   | 106.9(3)  | ..... Senseless s.u. |
| H11B1             | -O112  | -H11B2 | 1_555   | 1_555 | 1_555     | # 7150 Check         |
| PLAT752_ALERT_4_C | Angle  | Calc   | 99.00,  | Rep   | 99.1(2)   | ..... Senseless s.u. |
| M1A1              | -O121  | -H12A1 | 1_555   | 1_555 | 1_555     | # 7153 Check         |
| PLAT752_ALERT_4_C | Angle  | Calc   | 115.00, | Rep   | 115.4(3)  | ..... Senseless s.u. |
| H13A1             | -O131  | -H13A2 | 1_555   | 1_555 | 1_555     | # 7177 Check         |
| PLAT752_ALERT_4_C | Angle  | Calc   | 103.00, | Rep   | 103.3(3)  | ..... Senseless s.u. |
| H14A1             | -O141  | -H14A2 | 1_555   | 1_555 | 1_555     | # 7190 Check         |
| PLAT752_ALERT_4_C | Angle  | Calc   | 100.00, | Rep   | 100.2(3)  | ..... Senseless s.u. |
| H15B1             | -O152  | -H15B2 | 1_555   | 1_555 | 1_555     | # 7195 Check         |
| PLAT752_ALERT_4_C | Angle  | Calc   | 42.00,  | Rep   | 42.20(16) | ..... Senseless s.u. |
| M1A1              | -H9A1  | -O91   | 1_555   | 1_555 | 1_555     | # 7199 Check         |
| PLAT752_ALERT_4_C | Angle  | Calc   | 57.00,  | Rep   | 57.41(17) | ..... Senseless s.u. |
| M1A1              | -H9A2  | -O91   | 1_555   | 1_555 | 1_555     | # 7209 Check         |
| PLAT752_ALERT_4_C | Angle  | Calc   | 52.00,  | Rep   | 52.0(2)   | ..... Senseless s.u. |
| M1A1              | -H10A1 | -O101  | 1_555   | 1_555 | 1_555     | # 7227 Check         |
| PLAT752_ALERT_4_C | Angle  | Calc   | 36.00,  | Rep   | 35.60(18) | ..... Senseless s.u. |
| M1A1              | -H11A1 | -O111  | 1_555   | 1_555 | 1_555     | # 7231 Check         |

|                   |       |        |          |       |           |       |           |       |
|-------------------|-------|--------|----------|-------|-----------|-------|-----------|-------|
| PLAT752_ALERT_4_C | Angle | Calc   | 58.00,   | Rep   | 58.20(18) | ..... | Senseless | s.u.  |
|                   | M1A1  | -H11A2 | -O111    | 1_555 | 1_555     | 1_555 | # 7269    | Check |
| PLAT752_ALERT_4_C | Angle | Calc   | 60.00,   | Rep   | 60.1(2)   | ..... | Senseless | s.u.  |
|                   | M1A1  | -H12A1 | -O121    | 1_555 | 1_555     | 1_555 | # 7282    | Check |
| PLAT752_ALERT_4_C | Angle | Calc   | 38.00,   | Rep   | 37.9(2)   | ..... | Senseless | s.u.  |
|                   | O152  | -H15B1 | -H15B2   | 1_555 | 1_555     | 1_555 | # 7336    | Check |
| PLAT752_ALERT_4_C | Angle | Calc   | 48.00,   | Rep   | 48.1(2)   | ..... | Senseless | s.u.  |
|                   | O141  | -H14A1 | -H14A2   | 1_555 | 1_555     | 1_555 | # 7339    | Check |
| PLAT752_ALERT_4_C | Angle | Calc   | 42.00,   | Rep   | 41.94(19) | ..... | Senseless | s.u.  |
|                   | O152  | -H15B2 | -H15B1   | 1_555 | 1_555     | 1_555 | # 7352    | Check |
| PLAT752_ALERT_4_C | Angle | Calc   | 29.00,   | Rep   | 28.54(13) | ..... | Senseless | s.u.  |
|                   | O141  | -H14A2 | -H14A1   | 1_555 | 1_555     | 1_555 | # 7361    | Check |
| PLAT755_ALERT_4_C | D-H   | Calc   | 1.01000, | Rep   | 1.012(3)  | ..... | Senseless | s.u.  |
|                   | O91   | -H9A1  |          | 1_555 | 1_555     | ..... | # 1       | Check |
| PLAT755_ALERT_4_C | D-H   | Calc   | 1.06000, | Rep   | 1.062(3)  | ..... | Senseless | s.u.  |
|                   | O91   | -H9A2  |          | 1_555 | 1_555     | ..... | # 2       | Check |
| PLAT755_ALERT_4_C | D-H   | Calc   | 0.99000, | Rep   | 0.989(3)  | ..... | Senseless | s.u.  |
|                   | O112  | -H11B1 |          | 1_555 | 1_555     | ..... | # 3       | Check |
| PLAT755_ALERT_4_C | D-H   | Calc   | 0.78000, | Rep   | 0.783(3)  | ..... | Senseless | s.u.  |
|                   | O101  | -H10A1 |          | 1_555 | 1_555     | ..... | # 4       | Check |
| PLAT755_ALERT_4_C | D-H   | Calc   | 0.90000, | Rep   | 0.905(3)  | ..... | Senseless | s.u.  |
|                   | O111  | -H11A1 |          | 1_555 | 1_555     | ..... | # 5       | Check |
| PLAT755_ALERT_4_C | D-H   | Calc   | 1.05000, | Rep   | 1.049(3)  | ..... | Senseless | s.u.  |
|                   | O92   | -H9B1  |          | 1_555 | 1_555     | ..... | # 6       | Check |
| PLAT755_ALERT_4_C | D-H   | Calc   | 1.07000, | Rep   | 1.070(3)  | ..... | Senseless | s.u.  |
|                   | O92   | -H9B2  |          | 1_555 | 1_555     | ..... | # 7       | Check |
| PLAT755_ALERT_4_C | D-H   | Calc   | 0.99000, | Rep   | 0.988(3)  | ..... | Senseless | s.u.  |
|                   | O112  | -H11B2 |          | 1_555 | 1_555     | ..... | # 8       | Check |
| PLAT755_ALERT_4_C | D-H   | Calc   | 0.99000, | Rep   | 0.988(3)  | ..... | Senseless | s.u.  |
|                   | O112  | -H11B2 |          | 1_555 | 1_555     | ..... | # 9       | Check |
| PLAT755_ALERT_4_C | D-H   | Calc   | 1.01000, | Rep   | 1.006(3)  | ..... | Senseless | s.u.  |
|                   | O111  | -H11A2 |          | 1_555 | 1_555     | ..... | # 10      | Check |
| PLAT755_ALERT_4_C | D-H   | Calc   | 0.92000, | Rep   | 0.920(3)  | ..... | Senseless | s.u.  |
|                   | O121  | -H12A1 |          | 1_555 | 1_555     | ..... | # 11      | Check |
| PLAT755_ALERT_4_C | D-H   | Calc   | 0.77000, | Rep   | 0.774(3)  | ..... | Senseless | s.u.  |
|                   | O122  | -H12B1 |          | 1_555 | 1_555     | ..... | # 12      | Check |
| PLAT755_ALERT_4_C | D-H   | Calc   | 0.93000, | Rep   | 0.934(3)  | ..... | Senseless | s.u.  |
|                   | O131  | -H13A1 |          | 1_555 | 1_555     | ..... | # 13      | Check |
| PLAT755_ALERT_4_C | D-H   | Calc   | 0.89000, | Rep   | 0.893(4)  | ..... | Senseless | s.u.  |
|                   | O131  | -H13A2 |          | 1_555 | 1_555     | ..... | # 14      | Check |
| PLAT755_ALERT_4_C | D-H   | Calc   | 0.89000, | Rep   | 0.893(4)  | ..... | Senseless | s.u.  |
|                   | O131  | -H13A2 |          | 1_555 | 1_555     | ..... | # 15      | Check |
| PLAT755_ALERT_4_C | D-H   | Calc   | 0.89000, | Rep   | 0.893(4)  | ..... | Senseless | s.u.  |
|                   | O131  | -H13A2 |          | 1_555 | 1_555     | ..... | # 16      | Check |
| PLAT755_ALERT_4_C | D-H   | Calc   | 1.01000, | Rep   | 1.010(4)  | ..... | Senseless | s.u.  |
|                   | O151  | -H15A1 |          | 1_555 | 1_555     | ..... | # 17      | Check |
| PLAT755_ALERT_4_C | D-H   | Calc   | 1.04000, | Rep   | 1.038(3)  | ..... | Senseless | s.u.  |
|                   | O152  | -H15B1 |          | 1_555 | 1_555     | ..... | # 20      | Check |
| PLAT755_ALERT_4_C | D-H   | Calc   | 1.04000, | Rep   | 1.038(3)  | ..... | Senseless | s.u.  |
|                   | O152  | -H15B1 |          | 1_555 | 1_555     | ..... | # 21      | Check |
| PLAT755_ALERT_4_C | D-H   | Calc   | 0.70000, | Rep   | 0.705(2)  | ..... | Senseless | s.u.  |
|                   | O141  | -H14A1 |          | 1_555 | 1_555     | ..... | # 22      | Check |
| PLAT755_ALERT_4_C | D-H   | Calc   | 0.94000, | Rep   | 0.941(3)  | ..... | Senseless | s.u.  |
|                   | O132  | -H13B2 |          | 1_555 | 1_555     | ..... | # 23      | Check |
| PLAT755_ALERT_4_C | D-H   | Calc   | 0.95000, | Rep   | 0.954(4)  | ..... | Senseless | s.u.  |
|                   | O152  | -H15B2 |          | 1_555 | 1_555     | ..... | # 24      | Check |
| PLAT755_ALERT_4_C | D-H   | Calc   | 0.92000, | Rep   | 0.924(3)  | ..... | Senseless | s.u.  |

|                         |       |        |              |          |       |                |
|-------------------------|-------|--------|--------------|----------|-------|----------------|
|                         | O142  | -H14B1 | 1_555        | 1_555    | ..... | # 25 Check     |
| PLAT755_ALERT_4_C D-H   | Calc  |        | 0.92000, Rep | 0.924(3) | ..... | Senseless s.u. |
|                         | O142  | -H14B1 | 1_555        | 1_555    | ..... | # 26 Check     |
| PLAT755_ALERT_4_C D-H   | Calc  |        | 1.10000, Rep | 1.099(3) | ..... | Senseless s.u. |
|                         | O141  | -H14A2 | 1_555        | 1_555    | ..... | # 27 Check     |
| PLAT756_ALERT_4_C H...A | Calc  |        | 1.82000, Rep | 1.817(3) | ..... | Senseless s.u. |
|                         | H9A1  | -052   | 1_555        | 4_455    | ..... | # 1 Check      |
| PLAT756_ALERT_4_C H...A | Calc  |        | 1.79000, Rep | 1.788(3) | ..... | Senseless s.u. |
|                         | H9A2  | -061   | 1_555        | 1_555    | ..... | # 2 Check      |
| PLAT756_ALERT_4_C H...A | Calc  |        | 1.85000, Rep | 1.848(3) | ..... | Senseless s.u. |
|                         | H11B1 | -012   | 1_555        | 4_545    | ..... | # 3 Check      |
| PLAT756_ALERT_4_C H...A | Calc  |        | 2.04000, Rep | 2.044(3) | ..... | Senseless s.u. |
|                         | H10A1 | -0142  | 1_555        | 4_555    | ..... | # 4 Check      |
| PLAT756_ALERT_4_C H...A | Calc  |        | 1.94000, Rep | 1.935(3) | ..... | Senseless s.u. |
|                         | H11A1 | -011   | 1_555        | 4_564    | ..... | # 5 Check      |
| PLAT756_ALERT_4_C H...A | Calc  |        | 1.86000, Rep | 1.858(3) | ..... | Senseless s.u. |
|                         | H9B1  | -062   | 1_555        | 1_555    | ..... | # 6 Check      |
| PLAT756_ALERT_4_C H...A | Calc  |        | 1.74000, Rep | 1.738(3) | ..... | Senseless s.u. |
|                         | H9B2  | -051   | 1_555        | 4_554    | ..... | # 7 Check      |
| PLAT756_ALERT_4_C H...A | Calc  |        | 1.94000, Rep | 1.938(3) | ..... | Senseless s.u. |
|                         | H11B2 | -021   | 1_555        | 1_544    | ..... | # 8 Check      |
| PLAT756_ALERT_4_C H...A | Calc  |        | 2.27000, Rep | 2.271(3) | ..... | Senseless s.u. |
|                         | H11B2 | -042   | 1_555        | 4_545    | ..... | # 9 Check      |
| PLAT756_ALERT_4_C H...A | Calc  |        | 1.86000, Rep | 1.861(3) | ..... | Senseless s.u. |
|                         | H11A2 | -022   | 1_555        | 1_466    | ..... | # 10 Check     |
| PLAT756_ALERT_4_C H...A | Calc  |        | 1.90000, Rep | 1.902(3) | ..... | Senseless s.u. |
|                         | H12A1 | -0141  | 1_555        | 1_555    | ..... | # 11 Check     |
| PLAT756_ALERT_4_C H...A | Calc  |        | 2.02000, Rep | 2.022(3) | ..... | Senseless s.u. |
|                         | H12B1 | -0142  | 1_555        | 1_555    | ..... | # 12 Check     |
| PLAT756_ALERT_4_C H...A | Calc  |        | 1.78000, Rep | 1.776(3) | ..... | Senseless s.u. |
|                         | H13A1 | -0151  | 1_555        | 1_555    | ..... | # 13 Check     |
| PLAT756_ALERT_4_C H...A | Calc  |        | 2.37000, Rep | 2.366(3) | ..... | Senseless s.u. |
|                         | H13A2 | -X2    | 1_555        | 2_755    | ..... | # 14 Check     |
| PLAT756_ALERT_4_C H...A | Calc  |        | 2.14000, Rep | 2.140(3) | ..... | Senseless s.u. |
|                         | H13A2 | -031   | 1_555        | 1_555    | ..... | # 15 Check     |
| PLAT756_ALERT_4_C H...A | Calc  |        | 2.42000, Rep | 2.416(3) | ..... | Senseless s.u. |
|                         | H13A2 | -072   | 1_555        | 2_755    | ..... | # 16 Check     |
| PLAT756_ALERT_4_C H...A | Calc  |        | 2.49000, Rep | 2.494(3) | ..... | Senseless s.u. |
|                         | H15A1 | -0142  | 1_555        | 2_655    | ..... | # 17 Check     |
| PLAT756_ALERT_4_C H...A | Calc  |        | 1.86000, Rep | 1.862(3) | ..... | Senseless s.u. |
|                         | HA1A  | -071   | 1_555        | 4_564    | ..... | # 18 Check     |
| PLAT756_ALERT_4_C H...A | Calc  |        | 1.86000, Rep | 1.862(3) | ..... | Senseless s.u. |
|                         | HA1A  | -071   | 1_555        | 4_564    | ..... | # 19 Check     |
| PLAT756_ALERT_4_C H...A | Calc  |        | 1.89000, Rep | 1.890(3) | ..... | Senseless s.u. |
|                         | H15B1 | -021   | 1_555        | 2_744    | ..... | # 20 Check     |
| PLAT756_ALERT_4_C H...A | Calc  |        | 2.38000, Rep | 2.375(3) | ..... | Senseless s.u. |
|                         | H15B1 | -0132  | 1_555        | 3_753    | ..... | # 21 Check     |
| PLAT756_ALERT_4_C H...A | Calc  |        | 2.11000, Rep | 2.110(3) | ..... | Senseless s.u. |
|                         | H14A1 | -082   | 1_555        | 4_455    | ..... | # 22 Check     |
| PLAT756_ALERT_4_C H...A | Calc  |        | 1.76000, Rep | 1.756(3) | ..... | Senseless s.u. |
|                         | H13B2 | -0152  | 1_555        | 1_555    | ..... | # 23 Check     |
| PLAT756_ALERT_4_C H...A | Calc  |        | 2.41000, Rep | 2.407(3) | ..... | Senseless s.u. |
|                         | H15B2 | -0141  | 1_555        | 2_644    | ..... | # 24 Check     |
| PLAT756_ALERT_4_C H...A | Calc  |        | 2.49000, Rep | 2.491(2) | ..... | Senseless s.u. |
|                         | H14B1 | -X2    | 1_555        | 3_754    | ..... | # 25 Check     |
| PLAT756_ALERT_4_C H...A | Calc  |        | 2.01000, Rep | 2.014(3) | ..... | Senseless s.u. |
|                         | H14B1 | -081   | 1_555        | 4_554    | ..... | # 26 Check     |



```

PLAT756_ALERT_4_C H...A Calc 1.72000, Rep 1.719(3) ..... Senseless s.u.
      H14A2 -O32 1_555 4_456 ..... # 27 Check
PLAT758_ALERT_4_C D-H..A Calc 172.00, Rep 171.90(19) ..... Senseless s.u.
      O91 -H9A2 -O61 1_555 1_555 1_555 # 2 Check
PLAT758_ALERT_4_C D-H..A Calc 164.00, Rep 163.55(19) ..... Senseless s.u.
      O92 -H9B1 -O62 1_555 1_555 1_555 # 6 Check
PLAT758_ALERT_4_C D-H..A Calc 158.00, Rep 158.4(2) ..... Senseless s.u.
      O121 -H12A1 -O141 1_555 1_555 1_555 # 11 Check
PLAT758_ALERT_4_C D-H..A Calc 172.00, Rep 172.2(3) ..... Senseless s.u.
      O122 -H12B1 -O142 1_555 1_555 1_555 # 12 Check
PLAT758_ALERT_4_C D-H..A Calc 172.00, Rep 171.6(2) ..... Senseless s.u.
      O131 -H13A1 -O151 1_555 1_555 1_555 # 13 Check
PLAT758_ALERT_4_C D-H..A Calc 143.00, Rep 143.24(19) ..... Senseless s.u.
      O131 -H13A2 -O31 1_555 1_555 1_555 # 15 Check
PLAT758_ALERT_4_C D-H..A Calc 173.00, Rep 173.5(2) ..... Senseless s.u.
      O132 -H13B2 -O152 1_555 1_555 1_555 # 23 Check

```

### Alert level G

FORMU01\_ALERT\_2\_G There is a discrepancy between the atom counts in the  
 \_chemical\_formula\_sum and the formula from the \_atom\_site\* data.  
 Atom count from \_chemical\_formula\_sum: H21 Al0.3 Fe1.71 K0.82 Mn1.98 O3  
 Atom count from the \_atom\_site data: H21 Al0.3 Fe1.706 K0.824 Mn1.984

ABSMU01\_ALERT\_1\_G Calculation of \_exptl\_absorpt\_correction\_mu  
 not performed for this radiation type.

CELLZ01\_ALERT\_1\_G Difference between formula and atom\_site contents detected.

CELLZ01\_ALERT\_1\_G ALERT: Large difference may be due to a

symmetry error - see SYMMG tests

From the CIF: \_cell\_formula\_units\_Z 4

From the CIF: \_chemical\_formula\_sum H21 O33 Al0.3 P4 K0.82 Ti0.99 Mn1.

TEST: Compare cell contents of formula and atom\_site data

| atom | Z*formula | cif sites | diff  |
|------|-----------|-----------|-------|
| H    | 84.00     | 84.00     | 0.00  |
| O    | 132.00    | 132.70    | -0.70 |
| Al   | 1.20      | 1.20      | 0.00  |
| P    | 16.00     | 16.00     | 0.00  |
| K    | 3.28      | 3.30      | -0.02 |
| Ti   | 3.96      | 3.98      | -0.02 |
| Mn   | 7.92      | 7.94      | -0.02 |
| Fe   | 6.84      | 6.82      | 0.02  |

PLAT004\_ALERT\_5\_G Polymeric Structure Found with Maximum Dimension 3 Info

PLAT005\_ALERT\_5\_G No Embedded Refinement Details Found in the CIF Please Do !

PLAT007\_ALERT\_5\_G Number of Unrefined Donor-H Atoms ..... 21 Report

H9A1 H9A2 H11B1 H10A1 H11A1 H9B1 H9B2 H11B2 H11A2 H12A1 H12B1  
 H13A1 H13A2 H13B2 HalA H14A1 H14A2 H14B1 H15A1 H15B1 H15B2

```

PLAT017_ALERT_1_G Check Scattering Type Consistency of M1A1 as MN
PLAT017_ALERT_1_G Check Scattering Type Consistency of M1A2 as MN
PLAT017_ALERT_1_G Check Scattering Type Consistency of M2A1 as FE
PLAT017_ALERT_1_G Check Scattering Type Consistency of M2B1 as AL
PLAT017_ALERT_1_G Check Scattering Type Consistency of M2C1 as TI
PLAT017_ALERT_1_G Check Scattering Type Consistency of M2A2 as FE
PLAT017_ALERT_1_G Check Scattering Type Consistency of M2B2 as AL
PLAT017_ALERT_1_G Check Scattering Type Consistency of M2C2 as TI
PLAT017_ALERT_1_G Check Scattering Type Consistency of M3A1 as TI
PLAT017_ALERT_1_G Check Scattering Type Consistency of M3B1 as FE
PLAT017_ALERT_1_G Check Scattering Type Consistency of M3A2 as TI

```

```

PLAT017_ALERT_1_G Check Scattering Type Consistency of M3B2      as      FE
PLAT017_ALERT_1_G Check Scattering Type Consistency of X1      as      O
PLAT017_ALERT_1_G Check Scattering Type Consistency of X2      as      O
PLAT045_ALERT_1_G Calculated and Reported Z Differ by a Factor ... 0.250 Check
PLAT068_ALERT_1_G Reported F000 Differs from Calcd (or Missing)... Please Check
PLAT112_ALERT_2_G ADDSYM Detects New (Pseudo) Symm. Elem      A      83 %Fit
PLAT300_ALERT_4_G Atom Site Occupancy of M2B1      Constrained at      0.15 Check
PLAT300_ALERT_4_G Atom Site Occupancy of M2B2      Constrained at      0.15 Check
PLAT301_ALERT_3_G Main Residue Disorder .....(Resd 1 )      13% Note
PLAT302_ALERT_4_G Anion/Solvent/Minor-Residue Disorder (Resd 2 ) 100% Note
PLAT302_ALERT_4_G Anion/Solvent/Minor-Residue Disorder (Resd 7 ) 100% Note
PLAT302_ALERT_4_G Anion/Solvent/Minor-Residue Disorder (Resd 8 ) 100% Note
PLAT311_ALERT_2_G Isolated Disordered Oxygen Atom (No H's ?) ..... Ow2 Check
PLAT720_ALERT_4_G Number of Unusual/Non-Standard Labels ..... 37 Note
      M1A1      M1A2      M2A1      M2B1      M2C1      M2A2      M2B2      M2C2
      M3A1      M3B1      M3A2      M3B2      Ow1      Ow2      X1      X2
      H9A1      H9A2      H11B1      H10A1      H11A1      H9B1      H9B2      H11B2
      H11A2      H12A1      H12B1      H13A1      H13A2      H15A1      Ha1A      H15B1
      H14A1      H13B2      H15B2      H14B1      H14A2
PLAT808_ALERT_5_G No Parseable SHELXL Style Weighting Scheme Found      Please Check
PLAT883_ALERT_1_G No Info/Value for _atom_sites_solution_primary .      Please Do !
PLAT951_ALERT_5_G Calculated (ThMax) and CIF-Reported Kmax Differ      3 Units
PLAT966_ALERT_5_G Note: Non-Standard (i.e. 2.0) OMIT Threshold of      3.0 Sig(I)

```

---

```

0 ALERT level A = Most likely a serious problem - resolve or explain
1 ALERT level B = A potentially serious problem, consider carefully
175 ALERT level C = Check. Ensure it is not caused by an omission or oversight
36 ALERT level G = General information/check it is not something unexpected

22 ALERT type 1 CIF construction/syntax error, inconsistent or missing data
4 ALERT type 2 Indicator that the structure model may be wrong or deficient
10 ALERT type 3 Indicator that the structure quality may be low
170 ALERT type 4 Improvement, methodology, query or suggestion
6 ALERT type 5 Informative message, check

```

---

## Validation response form

Please find below a validation response form (VRF) that can be filled in and pasted into your CIF.

```

# start Validation Reply Form
_vrf_GOODF01_I
;
PROBLEM: The least squares goodness of fit parameter lies
RESPONSE: ...
;
_vrf_PLAT355_I
;
PROBLEM: Long O-H (X0.82,N0.98A) O141 - H14A2 . 1.10 Ang.
RESPONSE: ...
;
_vrf_PLAT041_I
;
PROBLEM: Calc. and Reported SumFormula Strings Differ Please Check
RESPONSE: ...
;

```

```
_vrf_PLAT077_I
;
PROBLEM: Unitcell Contains Non-integer Number of Atoms ..      Please Check
RESPONSE: ...
;
_vrf_PLAT127_I
;
PROBLEM: Implicit Hall Symbol  Inconsistent with Explicit      -P 2ycb Check
RESPONSE: ...
;
_vrf_PLAT354_I
;
PROBLEM: Short  O-H (X0.82,N0.98A)  O141      - H14A1      .      0.70 Ang.
RESPONSE: ...
;
_vrf_PLAT751_I
;
PROBLEM: Bond      Calc      2.84000, Rep  2.8426(11) ..... Senseless s.u.
RESPONSE: ...
;
_vrf_PLAT752_I
;
PROBLEM: Angle      Calc      87.00, Rep  87.15(3) ..... Senseless s.u.
RESPONSE: ...
;
_vrf_PLAT755_I
;
PROBLEM: D-H      Calc      1.01000, Rep  1.012(3) ..... Senseless s.u.
RESPONSE: ...
;
_vrf_PLAT756_I
;
PROBLEM: H...A      Calc      1.82000, Rep  1.817(3) ..... Senseless s.u.
RESPONSE: ...
;
_vrf_PLAT758_I
;
PROBLEM: D-H...A      Calc      172.00, Rep  171.90(19) ..... Senseless s.u.
RESPONSE: ...
;
# end Validation Reply Form
```

---

It is advisable to attempt to resolve as many as possible of the alerts in all categories. Often the minor alerts point to easily fixed oversights, errors and omissions in your CIF or refinement strategy, so attention to these fine details can be worthwhile. In order to resolve some of the more serious problems it may be necessary to carry out additional measurements or structure refinements. However, the purpose of your study may justify the reported deviations and the more serious of these should normally be commented upon in the discussion or experimental section of a paper or in the "special\_details" fields of the CIF. checkCIF was carefully designed to identify outliers and unusual parameters, but every test has its limitations and alerts that are not important in a particular case may appear. Conversely, the absence of alerts does not guarantee there are no aspects of the results needing attention. It is up to the individual to critically assess their own results and, if necessary, seek expert advice.

### **Publication of your CIF in IUCr journals**

A basic structural check has been run on your CIF. These basic checks will be run on all CIFs submitted for publication in IUCr journals (*Acta Crystallographica*, *Journal of Applied Crystallography*, *Journal of Synchrotron Radiation*); however, if you intend to submit to *Acta Crystallographica Section C* or *E* or *IUCrData*, you should make sure that full publication checks are run on the final version of your CIF prior to submission.

### **Publication of your CIF in other journals**

Please refer to the *Notes for Authors* of the relevant journal for any special instructions relating to CIF submission.

Datablock I - ellipsoid plot

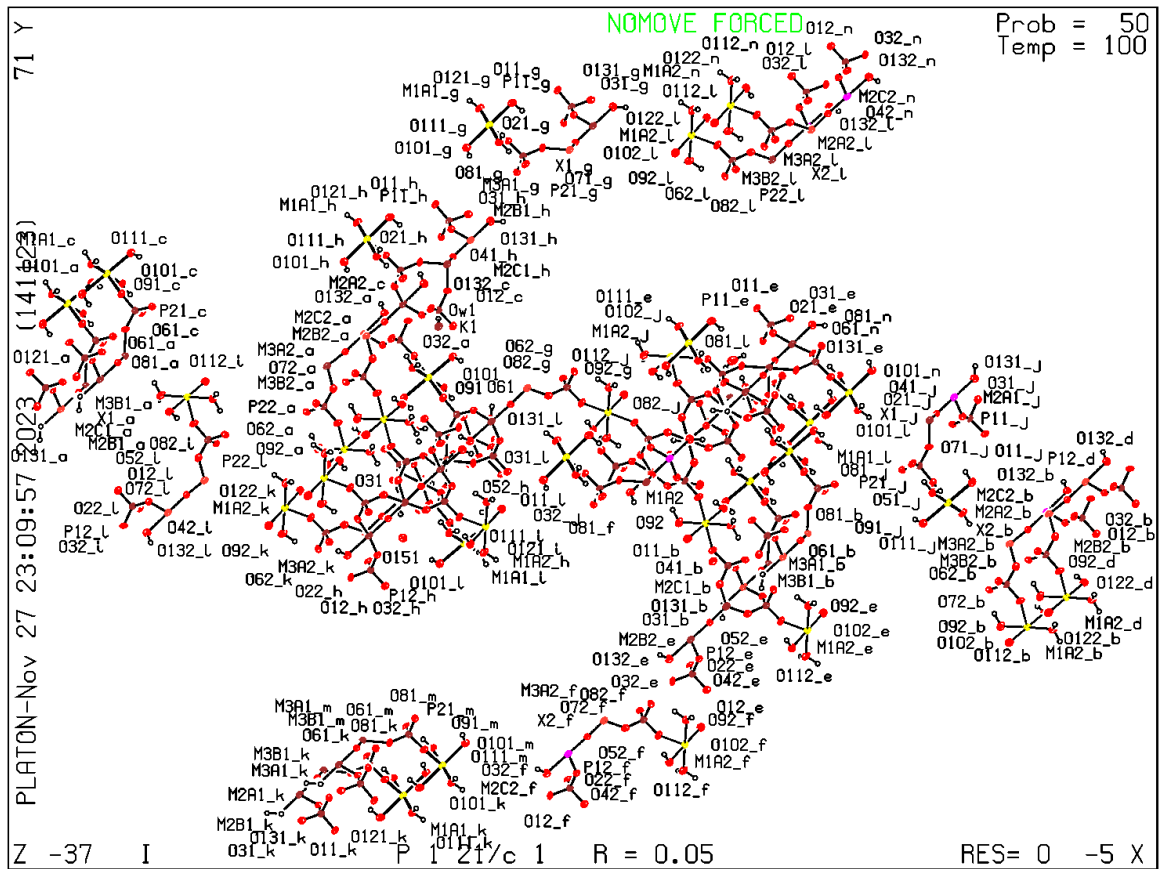

Supplement: Supplementary file 1 [file ejm-36-267-2024-supplement.pdf]
